# Supplementary material
Source: PubMed Central journal article supplement (PMC4870834)
Supplement: NIHMS786264-supplement-Sup_Text.pdf [file NIHMS786264-supplement-Sup_Text.pdf]

## **Supporting Information**

### ***Sulfotransferase IA1 Substrate Selectivity - A Molecular Clamp Mechanism***

*Ian Cook, Ting Wang and Thomas S. Leyh*

Department of Microbiology and Immunology, Albert Einstein College of Medicine, 1300

Morris Park Ave, Bronx, New York 10461-1926

***Corresponding Author:***

Thomas Leyh, Ph. D.

Phone: 718-430-2857

Fax: 718-430-8711

E-mail: [tom.leyh@einstein.yu.edu](mailto:tom.leyh@einstein.yu.edu)

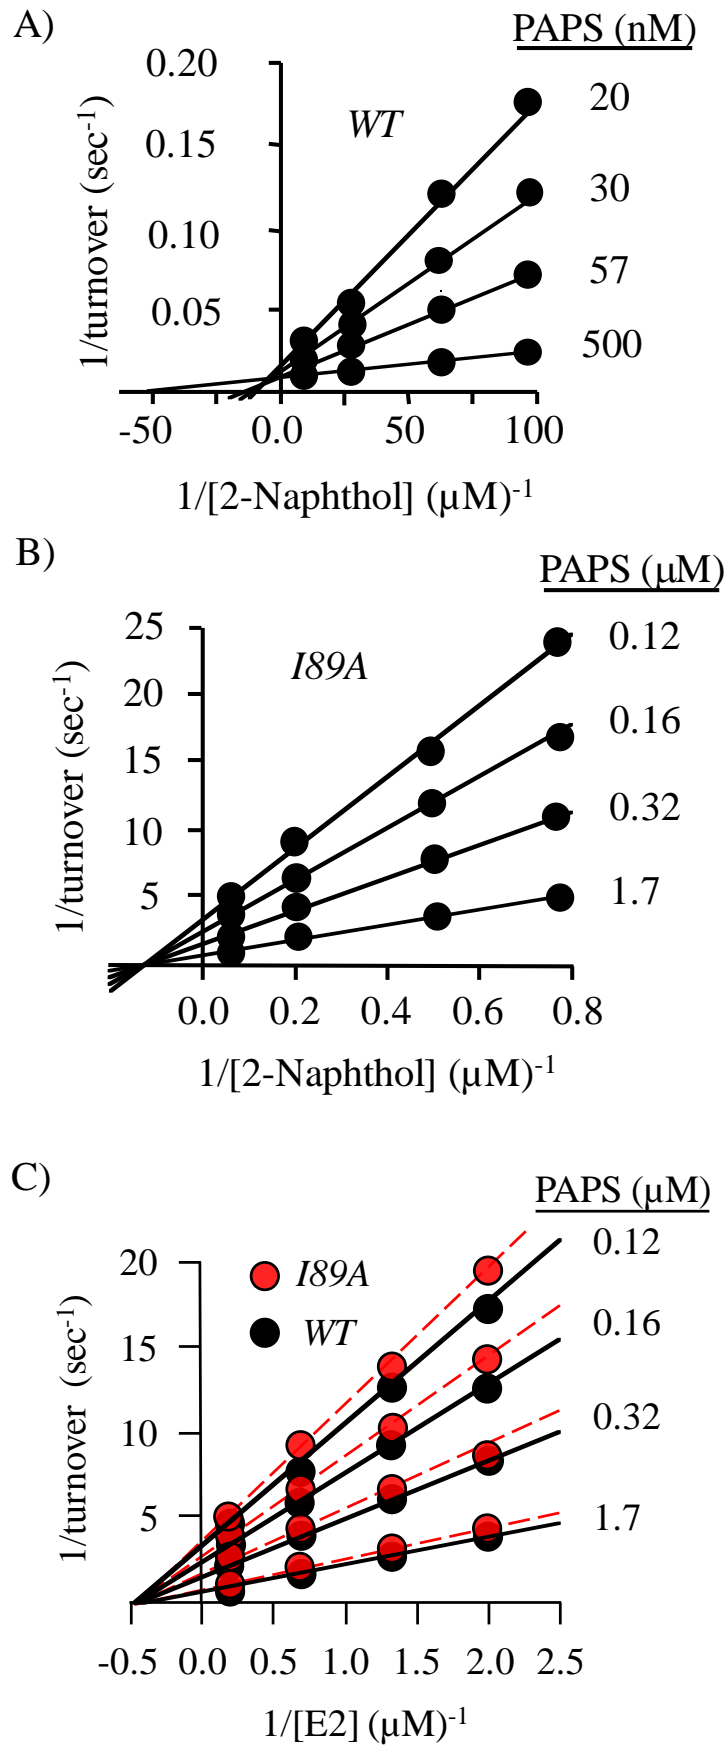

**S.1. The Effect of Lower Lip Mutation (I89A) on the Initial-Rate Parameters of Positive and**

**Neutral Synergy Substrates. A.) An initial-rate study of 2-Nap sulfonation by SULT1A1.**

Sulfonation was measured by monitoring transfer of sulfonyl moiety from [<sup>35</sup>S]-PAPS to 2-Nap.

Reaction conditions were as follows: SULT1A1 (5.0 nM, dimer), 2-Nap (0.010 – 0.25 μM), [<sup>35</sup>S]-PAPS (20 – 500 nM, SA = 4.3 Ci mmol<sup>-1</sup>), MgCl<sub>2</sub> (5.0 mM), NaPO<sub>4</sub> (50 mM), pH 7.2, 25 ± 2 °C. Reactions were initiated by addition of [<sup>35</sup>S]-PAPS and quenched as described in *Materials and Methods*. Radiolabelled reactants were separated using anion exchange TLC and quantitated using STORM imaging. **B.) An initial-rate study of 2-Nap sulfonation by I89A SULT1A1.**

Reaction conditions were identical to A except: 2-Nap (0.50 - 13 μM) and [<sup>35</sup>S]-PAPS (0.17 – 1.7 μM). **C.) An initial-rate study of E2 sulfonation by wild type (black) and I89A (red)**

**SULT1A1.** E2 sulfonation was measured by monitoring the conversion of [<sup>3</sup>H]-E2 (SA = 15 Ci mmol<sup>-1</sup>) to [<sup>3</sup>H]-E2-sulfate. Reaction conditions were similar to B except: [<sup>3</sup>H]-E2 (0.30 -7.5 μM), PAPS (0.17 – 1.7 μM). Products were separated using chloroform extraction and quantitated by liquid scintillation spectroscopy. Initial rates were determined at the 16 conditions defined by a 4 x 4 concentration matrix in which donor and acceptor are varied from 0.20 – 5.0 x K<sub>m</sub> in four, equal increments in double-reciprocal space. Velocities, determined in duplicate, were obtained from least-squares fitting of four-point progress curves. In each case, the maximum product formed was less than 5% of the product formed at the endpoint of the reaction. The lines through the points represent the global best-fit of the data using the sequential Bi-Bi model of Cleland (SEQUENO (I)).

*GROMACS trajectories of SULT1A1 ternary complexes.* Movies 1-4 show 1.0 ns, GROMACS trajectories of wild-type SULT1A1 ternary complexes (E•PAPS•acceptor) with Acet, E2, NAP, or DHEA, respectively. The fifth movie predicts the behavior of 2-Nap in the ternary complex of the I89A mutant. The GROMACS protocols are described in *Methods*. Movies were constructed using Pymol from the 251 sets of structural coordinates taken from the 1.0 ns trajectories at successive 4.0 ps intervals. Water, Na<sup>+</sup>, Cl<sup>-</sup>, and hydrogen were removed for clarity. Secondary structures were assigned manually using the SULT1A1·PAP structure (4GRA (2)) as a template. The protein backbone is rendered in cartoon and the active-site His, PAPS, and acceptors are shown in stick. Dotted lines indicate the position of the nucleophilic hydroxyl relative to the sulfuryl group and active-site His. Phe81 and Phe84 are shown in stick and surface. Images were loaded into Windows Movie Creator and published in Quick Time format.

## References

1. Cleland, W. W. (1979) Statistical analysis of enzyme kinetic data, *Methods Enzymol* 63, 103-138.
2. Cook, I., Wang, T., Almo, S. C., Kim, J., Falany, C. N., and Leyh, T. S. (2013) The gate that governs sulfotransferase selectivity, *Biochemistry* 52, 415-424.
